# Supplementary material
Source: MDPI journal article supplement (https://www.mdpi.com/2072-4292/15/10/2681)
Supplement: s1 [file s1]

## Supplementary

**Table S1. Annual pre-monsoon AOD level percentage change of 43 urban agglomerations and 13 industrial districts**

| UAs and IDs | 2010-2011 | 2011-2012 | 2012-2013 | 2013-2014 | 2014-2015 | 2015-2016 | 2016-2017 | 2017-2018 | 2018-2019 | 2019-2020 |
|-------------|-----------|-----------|-----------|-----------|-----------|-----------|-----------|-----------|-----------|-----------|
| Kolkata     | -2.43     | 0.00      | 5.29      | -21.86    | 39.89     | -1.08     | -7.79     | 33.19     | -8.79     | -5.61     |
| Asansol     | -10.56    | -0.72     | 5.34      | -23.04    | 72.46     | -9.90     | 2.89      | -0.56     | -15.63    | 1.56      |
| Dhanbad     | -10.56    | -0.72     | 5.34      | -23.04    | 72.46     | -9.90     | 2.89      | -0.56     | -15.63    | 1.56      |
| Ranchi      | -4.44     | -11.30    | 6.74      | -16.14    | 62.34     | -16.49    | 9.57      | 18.59     | -28.74    | 17.00     |
| Jamshedpur  | -6.21     | -0.71     | 1.67      | -9.37     | 32.30     | 15.82     | -20.40    | 13.77     | -11.92    | -5.92     |
| Patna       | 6.77      | -13.33    | 12.76     | -32.45    | 55.17     | 19.84     | -3.44     | 19.75     | -29.21    | -10.84    |
| Lucknow     | -7.56     | 0.60      | -9.92     | -14.10    | 16.67     | 27.47     | -8.10     | 13.51     | -25.79    | -4.01     |
| Kanpur      | -14.19    | 4.04      | -16.08    | -14.10    | 16.67     | 35.60     | -13.61    | 16.51     | -27.70    | 1.34      |
| Allahabad   | -10.84    | -1.35     | -16.63    | -11.97    | 12.27     | 42.28     | -19.37    | 31.26     | -29.34    | 3.35      |
| Varanasi    | -5.41     | 0.18      | -13.55    | -5.77     | 9.41      | 23.40     | -8.10     | 25.57     | -30.62    | 0.81      |
| Meerut      | -9.71     | -1.08     | -4.89     | -6.10     | 7.51      | 15.09     | -14.43    | 18.77     | -15.65    | -7.84     |
| Ghaziabad   | -9.71     | -1.08     | -4.89     | -6.10     | 7.51      | 15.09     | -14.43    | 18.77     | -15.65    | -7.84     |
| Agra        | -11.09    | 25.32     | -21.50    | -66.18    | 49.46     | 15.27     | -9.78     | 156.64    | -55.04    | 43.94     |
| Delhi       | -9.71     | -1.08     | -4.89     | -6.10     | 7.51      | 15.09     | -14.43    | 18.77     | -15.65    | -7.84     |
| Chandigarh  | -20.24    | 18.22     | -12.66    | -16.60    | 21.16     | 18.30     | -12.13    | 21.80     | -40.07    | 0.82      |
| Amritsar    | -3.89     | 18.62     | -13.14    | -19.06    | 36.41     | -13.35    | 6.16      | 4.64      | -22.00    | -9.48     |
| Jodhpur     | -50.57    | 53.70     | -40.66    | 3.55      | 51.96     | -13.23    | -13.38    | 29.18     | -23.59    | -40.43    |
| Gwalior     | -25.16    | 9.52      | -12.53    | -31.87    | 82.40     | 9.18      | -18.97    | 35.64     | -35.29    | -14.55    |
| Bhopal      | 8.66      | 1.66      | -17.97    | -18.33    | 27.32     | 4.60      | -15.75    | 59.13     | -38.25    | 3.10      |
| Indore      | 13.47     | 11.15     | -17.15    | -16.02    | 22.33     | 1.14      | -7.89     | 36.73     | -38.81    | 32.68     |
| Jabalpur    | -0.44     | -4.41     | 18.89     | -20.54    | 51.71     | -23.15    | -1.67     | 58.30     | -43.82    | 36.36     |
| Ahmedabad   | -5.48     | 16.23     | -14.71    | -5.56     | 26.93     | -19.27    | -1.21     | 27.52     | -14.63    | -19.10    |
| Surat       | 10.60     | -1.55     | -8.95     | 19.94     | -8.43     | 13.16     | -20.47    | 23.98     | -12.50    | -20.49    |
| Vadodara    | 1.66      | 14.71     | -17.66    | -8.65     | 34.09     | -15.25    | -6.33     | 29.54     | -17.86    | -21.07    |

|                    |        |        |        |        |        |        |        |       |        |        |
|--------------------|--------|--------|--------|--------|--------|--------|--------|-------|--------|--------|
| Rajkot             | -11.21 | 33.33  | -8.68  | -16.14 | 28.87  | -14.93 | 3.45   | 14.55 | -8.99  | -22.67 |
| Mumbai             | 8.87   | 26.38  | -5.67  | -46.72 | 63.59  | 29.78  | -37.68 | 26.36 | -24.85 | 26.53  |
| Pune               | -2.87  | -5.01  | 1.86   | 3.96   | 7.62   | -8.99  | 0.90   | 12.17 | -24.60 | 0.35   |
| Nasik              | -1.02  | 0.00   | 2.31   | -8.54  | 9.89   | -2.75  | 2.83   | 4.00  | -16.35 | -3.45  |
| Raipur             | 19.62  | -2.91  | 10.08  | 7.92   | -1.83  | 10.98  | -24.42 | 59.33 | -18.01 | 5.76   |
| Durg-Bhilainagar   | 19.62  | -25.13 | 38.16  | -4.86  | 15.05  | 10.98  | -27.58 | 68.90 | -28.74 | 19.81  |
| Hyderabad          | -1.35  | -18.84 | 47.26  | 21.78  | -15.53 | -21.17 | 2.12   | 64.36 | -43.37 | 32.71  |
| Vijayawada         | -9.38  | 1.17   | 3.47   | 8.21   | -28.10 | 19.66  | 23.45  | 13.96 | -16.67 | -17.61 |
| Bangalore          | 5.92   | 10.86  | 3.56   | -21.78 | 28.94  | -15.34 | 26.85  | 7.67  | -16.22 | -3.81  |
| Chennai            | 9.80   | 23.11  | -0.19  | -28.12 | 15.54  | -16.37 | 33.24  | 0.20  | -14.46 | -14.79 |
| Coimbatore         | 11.48  | 6.37   | -12.21 | -1.31  | 18.35  | -20.22 | 23.94  | 12.73 | -23.39 | 13.42  |
| Madurai            | -4.47  | 44.16  | -7.75  | -1.37  | -5.54  | -13.84 | 38.69  | 1.40  | -10.90 | -1.75  |
| Kannur             | 4.84   | 10.00  | 9.09   | -6.41  | 12.56  | -7.91  | -3.74  | 4.81  | -16.59 | 10.21  |
| Kozhikode          | 4.84   | 10.00  | 9.09   | -6.41  | 12.56  | -7.91  | -3.74  | 4.81  | -16.59 | 10.21  |
| Kollam             | 2.35   | 30.37  | -12.53 | -16.08 | -24.85 | 29.48  | -5.54  | 42.02 | -20.87 | 6.67   |
| Thiruvananthapuram | 3.88   | 30.75  | -20.88 | -7.22  | -24.85 | 26.29  | -3.15  | 42.02 | -15.60 | -20.65 |
| Thrissur           | 16.67  | 16.26  | -14.56 | -5.97  | 7.76   | -4.59  | 7.55   | -2.98 | -0.44  | -6.17  |
| Kochi              | 7.74   | 10.22  | -0.25  | -22.36 | 8.41   | 12.54  | 14.85  | -9.47 | -7.40  | -3.03  |
| Malappuram         | 16.67  | 16.26  | -14.56 | -5.97  | 7.76   | -4.59  | 7.55   | -2.98 | -0.44  | -6.17  |
| Jalpaiguri         | -23.77 | 25.73  | -8.36  | 2.89   | -14.92 | 39.81  | -24.89 | 19.41 | 31.15  | -44.29 |
| Purnia             | -5.04  | 0.55   | 19.95  | -21.44 | -12.30 | 46.28  | -14.00 | 15.96 | -5.83  | -17.91 |
| Gorakhpur          | -1.42  | 4.33   | 8.18   | -25.89 | 2.01   | 72.37  | -20.16 | 15.51 | -12.19 | -39.73 |
| Cuttak             | -20.47 | 17.88  | 17.13  | -2.34  | 12.65  | -3.16  | -4.78  | 16.78 | -12.50 | -14.05 |
| Lucknow            | -14.18 | 4.10   | -16.06 | -14.22 | 16.67  | 35.75  | -13.71 | 16.64 | -27.72 | 1.34   |
| Kanpur             | -14.18 | 4.10   | -16.06 | -14.22 | 16.67  | 35.75  | -13.71 | 16.64 | -27.72 | 1.34   |
| Bareilly           | -11.96 | 3.51   | -11.49 | -21.61 | 24.06  | 28.67  | -11.19 | 3.22  | -15.55 | -13.53 |
| Gwalior            | -25.02 | 9.32   | -12.45 | -31.94 | 59.66  | 9.95   | -7.99  | 24.54 | -29.59 | -14.55 |
| Jabalpur           | -25.81 | 9.68   | 6.76   | -20.28 | 51.54  | -8.98  | -19.86 | 62.32 | -43.36 | 4.94   |

|           |        |        |        |        |        |        |        |       |        |        |
|-----------|--------|--------|--------|--------|--------|--------|--------|-------|--------|--------|
| Bhopal    | 8.66   | 1.66   | -17.97 | -18.06 | 27.23  | 4.59   | -15.83 | 58.90 | -38.16 | 3.09   |
| Nagpur    | 27.73  | -11.63 | 11.64  | 0.42   | 20.77  | -5.76  | -14.14 | 59.94 | -33.69 | 11.92  |
| Kota      | -30.43 | 14.73  | -14.92 | -33.54 | 56.42  | -8.80  | -6.75  | 47.41 | -30.06 | -27.76 |
| Hyderabad | -1.46  | -18.61 | 46.98  | 21.76  | -15.60 | -21.17 | 2.36   | 64.21 | -43.52 | 33.00  |

**Table S2. Annual pre-monsoon AOD level percentage change of 14 biosphere reserves**

| BR                    | 2010-2011 | 2011-2012 | 2012-2013 | 2013-2014 | 2014-2015 | 2015-2016 | 2016-2017 | 2017-2018 | 2018-2019 | 2019-2020 |
|-----------------------|-----------|-----------|-----------|-----------|-----------|-----------|-----------|-----------|-----------|-----------|
| Sundarban             | 51.40     | -74.73    | 0.31      | 21.29     | 6.88      | -28.84    | 18.37     | -24.11    | -2.23     | 23.01     |
| Panna                 | 15.49     | 6.43      | 1.04      | 17.82     | -46.73    | -1.85     | 23.16     | -62.50    | 45.21     | 5.77      |
| Seshachalam           | 21.69     | -29.28    | -11.06    | 3.72      | 9.03      | 3.16      | -14.63    | -15.28    | 17.91     | 17.44     |
| Nilgiri               | -13.47    | -6.81     | -8.70     | 10.76     | -11.95    | 13.61     | -9.27     | -1.88     | 18.87     | -22.23    |
| Agasthyamalai         | -4.08     | -25.62    | 17.73     | 11.56     | 19.77     | -24.12    | -57.77    | 12.78     | 15.65     | 20.63     |
| Khanchendzonga        | 12.46     | -11.21    | -48.10    | 31.07     | 13.02     | -41.14    | 34.27     | 4.17      | -27.38    | 22.84     |
| Nokrek                | -12.44    | -5.27     | 10.16     | 0.08      | -2.71     | -17.58    | -3.02     | -5.92     | 13.00     | 7.44      |
| Nanda Devi            | -75.95    | 41.01     | 26.63     | -159.56   | 25.51     | 41.83     | -35.96    | 9.18      | -65.16    | -35.39    |
| Pachmarhi             | 25.81     | -9.68     | -6.76     | 20.28     | -51.54    | 8.98      | 19.86     | -62.32    | 43.36     | -4.94     |
| Achanakmar-Amarkantak | 20.35     | -4.01     | 6.10      | -18.29    | -14.02    | 13.81     | 7.21      | -42.16    | 33.22     | -28.21    |
| Simlipal              | 4.42      | -11.38    | 3.61      | 1.98      | -12.98    | -8.81     | 10.73     | -17.74    | 8.87      | 4.65      |
| Manas                 | 14.36     | -27.84    | 3.90      | 5.00      | 4.62      | -21.05    | 17.61     | -4.81     | -6.48     | 15.22     |
| Dibru-Saikhowa        | -23.20    | -12.57    | 8.39      | -18.52    | 14.48     | -33.16    | 29.92     | -10.50    | -16.48    | 23.69     |
| Dihang-Dibang         | 23.75     | -23.39    | -8.18     | -12.60    | 10.99     | -11.37    | 27.38     | -24.05    | 7.68      | 8.91      |

**Table S3. Annual pre-monsoon LST level percentage change of 43 urban agglomerations and 13 industrial districts**

| UAs and IDs | 2010-2011 | 2011-2012 | 2012-2013 | 2013-2014 | 2014-2015 | 2015-2016 | 2016-2017 | 2017-2018 | 2018-2019 | 2019-2020 |
|-------------|-----------|-----------|-----------|-----------|-----------|-----------|-----------|-----------|-----------|-----------|
| Kolkata     | -1.70     | 5.52      | -0.40     | -1.22     | -2.39     | 3.12      | -2.31     | 0.20      | 0.93      | 1.79      |
| Jabalpur    | -4.33     | 0.76      | -9.21     | 4.61      | -11.12    | 10.30     | -0.19     | 2.38      | 5.51      | -14.26    |

|            |        |       |       |       |       |       |       |        |       |        |
|------------|--------|-------|-------|-------|-------|-------|-------|--------|-------|--------|
| Asansol    | -3.96  | 2.36  | 2.04  | 1.26  | -5.22 | 5.01  | -8.42 | -0.60  | 1.32  | -2.43  |
| Dhanbad    | -1.75  | 1.65  | -2.13 | -1.53 | -1.56 | 6.07  | -4.03 | -2.83  | 1.04  | -7.53  |
| Ranchi     | -4.79  | 1.90  | 1.84  | -1.73 | -3.12 | 8.67  | 0.41  | -13.01 | 13.42 | -16.13 |
| Jalpaiguri | 4.15   | -0.75 | 0.57  | 2.71  | -4.97 | 0.09  | -2.36 | 1.67   | -2.72 | 2.33   |
| Jamshedpur | -5.25  | 6.04  | -1.90 | 2.06  | -5.84 | 8.30  | -1.22 | -15.66 | 4.41  | -5.46  |
| Patna      | -4.10  | 2.12  | 1.32  | 7.26  | -1.19 | 0.58  | -9.78 | 2.33   | 15.32 | -18.83 |
| Bhopal     | -1.78  | 0.32  | -0.55 | 0.76  | -5.95 | 5.65  | 1.74  | -0.74  | 8.68  | -15.35 |
| Indore     | -2.85  | 0.90  | -0.75 | -2.37 | -3.92 | 4.41  | 5.21  | -4.32  | 6.74  | -11.41 |
| Lucknow    | -5.30  | 3.73  | -2.26 | 3.26  | -6.32 | 6.34  | 1.46  | -2.46  | 11.34 | -17.17 |
| Kanpur     | -4.50  | 0.00  | 2.45  | -2.08 | -1.74 | 4.42  | -2.97 | -0.14  | 11.01 | -12.40 |
| Allahabad  | -5.07  | 2.49  | 4.70  | 2.17  | -4.07 | 2.99  | -5.18 | 4.40   | 10.14 | -18.76 |
| Varanasi   | -5.62  | 1.18  | 11.15 | -5.56 | 0.96  | 6.01  | 0.39  | -7.89  | 17.83 | -13.96 |
| Meerut     | -10.70 | 2.83  | 2.63  | -5.10 | 1.03  | 4.09  | -1.71 | 0.78   | 10.05 | -11.47 |
| Ghaziabad  | -10.69 | 5.35  | -0.61 | -5.48 | -0.77 | 10.63 | -2.83 | -2.49  | 9.41  | -11.66 |
| Agra       | -8.13  | 2.52  | 3.40  | -0.66 | -7.92 | 11.66 | -0.07 | -6.32  | 13.59 | -11.52 |
| Delhi      | -7.70  | 1.06  | 3.98  | -6.43 | 0.63  | 2.61  | -0.12 | 0.09   | 9.26  | -11.42 |
| Chandigarh | -8.92  | 0.74  | 3.69  | -3.29 | -4.53 | 10.85 | -2.47 | 3.41   | 7.23  | -13.51 |
| Amritsar   | -9.29  | -4.30 | 6.38  | -1.77 | -1.99 | 8.26  | -2.70 | 1.93   | 9.47  | -15.49 |
| Jodhpur    | -1.17  | -4.18 | 4.45  | -1.80 | -3.95 | 2.48  | -2.99 | 3.29   | 6.44  | -4.84  |
| Gwalior    | -5.14  | 0.05  | -4.70 | 1.65  | -6.50 | 6.38  | 3.08  | 5.94   | 4.19  | -14.68 |
| Ahmedabad  | -5.47  | -3.81 | 3.55  | 0.55  | -1.02 | 1.51  | 0.67  | 2.44   | 10.85 | -19.87 |
| Surat      | -5.64  | 0.35  | 7.48  | -3.16 | -1.12 | 4.05  | -4.52 | 0.37   | 4.51  | -9.13  |
| Vadodara   | -8.88  | 0.31  | -1.45 | -0.62 | 0.00  | 0.86  | 3.02  | -0.53  | 12.87 | -9.42  |
| Rajkot     | -6.09  | 1.86  | 2.21  | -3.61 | 3.87  | -3.60 | 3.48  | 2.67   | 3.01  | -6.49  |
| Mumbai     | -1.97  | -0.87 | -0.09 | 0.64  | 0.45  | 2.57  | -2.71 | -0.63  | 6.10  | -5.52  |
| Pune       | -3.13  | 3.30  | 1.13  | -3.00 | -3.80 | 8.35  | -1.96 | -3.05  | 7.47  | -9.06  |
| Nasik      | -2.64  | 0.10  | 0.67  | 1.49  | -6.51 | 4.25  | -1.69 | -4.44  | 10.80 | -5.87  |
| Raipur     | -14.55 | 11.89 | -7.08 | -2.97 | 0.17  | 11.49 | -3.28 | 1.30   | -1.23 | -12.74 |

|                    |       |       |       |       |       |       |       |       |       |        |
|--------------------|-------|-------|-------|-------|-------|-------|-------|-------|-------|--------|
| Durg-Bhilainagar   | -9.03 | 6.46  | -1.82 | -4.97 | -5.59 | 12.46 | -6.93 | 4.48  | 6.91  | -18.42 |
| Hyderabad          | 1.07  | 2.21  | 1.88  | -6.47 | -1.58 | 8.26  | 1.32  | -3.07 | 2.81  | -7.12  |
| Vijayawada         | -2.73 | 5.00  | 1.61  | -0.87 | 0.72  | 2.61  | -3.83 | -0.45 | 13.77 | -10.50 |
| Bangalore          | 0.46  | 4.25  | 2.30  | 2.11  | -9.36 | 11.65 | -4.51 | -7.85 | 8.40  | -3.08  |
| Chennai            | 0.00  | 0.19  | -0.11 | 6.06  | -6.02 | 0.91  | 1.47  | -0.83 | 6.66  | -8.18  |
| Coimbatore         | -2.79 | 2.18  | 4.49  | 0.07  | -6.41 | 4.00  | 2.22  | -5.23 | 11.48 | -10.68 |
| Madurai            | -5.86 | 2.22  | 7.90  | -4.68 | -7.96 | 5.23  | 4.11  | -5.01 | 11.48 | -6.19  |
| Kannur             | -0.10 | -2.89 | 3.37  | 2.08  | -0.72 | 2.02  | -1.02 | -7.38 | 3.91  | 3.15   |
| Kozhikode          | -6.24 | 1.24  | 4.99  | 1.95  | -5.93 | 4.76  | -0.25 | -4.14 | -1.34 | 6.87   |
| Kollam             | 1.62  | -4.90 | 10.35 | 0.63  | -3.33 | 1.17  | -4.36 | 0.30  | 5.25  | 2.70   |
| Thiruvananthapuram | -1.37 | -0.30 | 2.58  | 1.35  | -1.96 | 1.26  | -3.09 | 4.03  | 1.56  | -2.47  |
| Thrissur           | 0.36  | -2.12 | 6.66  | 2.90  | -6.04 | 1.42  | 0.89  | 0.73  | -3.41 | 8.07   |
| Kochi              | -1.82 | -3.97 | 4.68  | -0.72 | -0.17 | 0.13  | -2.68 | -0.51 | 4.86  | -6.14  |
| Malappuram         | -0.72 | 0.21  | 4.59  | -1.78 | -4.93 | 1.57  | 4.50  | -4.37 | 4.54  | -0.78  |
| Purnia             | -4.15 | 2.24  | -0.37 | 2.82  | -7.43 | 4.67  | -8.75 | 3.51  | 1.89  | -5.14  |
| Gorakhpur          | -9.95 | 3.48  | 3.02  | 3.36  | -9.08 | 10.55 | -7.20 | -1.61 | 17.92 | -15.97 |
| Cuttak             | -5.33 | 4.07  | -0.93 | -0.02 | -0.83 | 7.46  | -8.25 | -4.43 | 2.65  | -7.35  |
| Lucknow            | -6.64 | 3.83  | -1.77 | 0.65  | -2.65 | 4.11  | 0.00  | -2.52 | 10.63 | -15.51 |
| Kanpur             | -6.67 | 5.11  | 2.33  | -0.24 | -7.48 | 8.22  | -2.33 | -2.23 | 14.24 | -14.46 |
| Bareilly           | -6.72 | 4.13  | -0.60 | 2.09  | -6.61 | 4.43  | -2.16 | 0.10  | 13.96 | -13.56 |
| Gwalior            | -6.66 | 0.67  | 1.27  | -2.13 | -5.73 | 8.56  | 0.62  | 0.81  | 11.10 | -16.04 |
| Jabalpur           | -3.93 | 0.13  | 0.72  | -3.30 | -4.90 | 8.08  | 0.65  | -1.25 | 10.48 | -12.89 |
| Bhopal             | -1.62 | -1.54 | 3.08  | -2.58 | -4.06 | 6.64  | 0.03  | 0.41  | 8.48  | -12.86 |
| Nagpur             | -3.48 | 4.31  | -0.18 | -5.38 | -2.62 | 6.30  | 2.00  | -2.64 | 17.14 | -18.84 |
| Kota               | -5.10 | -5.28 | 4.95  | -3.62 | -1.25 | 4.88  | 0.80  | -1.15 | 6.82  | -7.96  |
| Hyderabad          | -2.78 | 1.71  | 0.10  | -3.25 | -0.05 | 4.47  | -1.08 | -3.88 | 7.99  | -5.02  |

**Table S4. LST anomaly of pre-monsoon average LST of 43 urban agglomerations and 13 industrial districts**

| UAs and IDs | 2010  | 2011  | 2012  | 2013  | 2014  | 2015  | 2016  | 2017  | 2018  | 2019  | 2020  |
|-------------|-------|-------|-------|-------|-------|-------|-------|-------|-------|-------|-------|
| Kolkata     | -0.48 | -1.06 | 0.79  | 0.65  | 0.22  | -0.61 | 0.45  | -0.36 | -0.29 | 0.03  | 0.65  |
| Jabalpur    | 4.12  | 2.09  | 2.43  | -1.73 | 0.16  | -4.61 | -0.68 | -0.76 | 0.24  | 2.61  | -3.86 |
| Asansol     | 1.29  | -0.21 | 0.65  | 1.41  | 1.89  | -0.12 | 1.71  | -1.52 | -1.73 | -1.27 | -2.13 |
| Dhanbad     | 1.46  | 0.76  | 1.41  | 0.56  | -0.04 | -0.64 | 1.66  | 0.04  | -1.05 | -0.66 | -3.51 |
| Ranchi      | 1.31  | -0.54 | 0.16  | 0.85  | 0.19  | -0.98 | 2.17  | 2.33  | -2.83 | 1.80  | -4.51 |
| Jalpaiguri  | -0.51 | 0.66  | 0.44  | 0.61  | 1.40  | -0.09 | -0.07 | -0.74 | -0.27 | -1.04 | -0.40 |
| Jamshedpur  | 1.73  | -0.36 | 1.92  | 1.16  | 1.97  | -0.37 | 2.76  | 2.26  | -4.06 | -2.56 | -4.50 |
| Patna       | -0.25 | -1.74 | -1.00 | -0.53 | 2.09  | 1.63  | 1.85  | -1.91 | -1.10 | 4.34  | -3.37 |
| Bhopal      | 0.72  | -0.07 | 0.07  | -0.17 | 0.16  | -2.45 | -0.12 | 0.64  | 0.31  | 4.13  | -3.21 |
| Indore      | 1.54  | 0.23  | 0.63  | 0.29  | -0.77 | -2.48 | -0.63 | 1.65  | -0.34 | 2.63  | -2.74 |
| Lucknow     | 0.79  | -1.19 | 0.13  | -0.70 | 0.47  | -1.87 | 0.33  | 0.87  | -0.05 | 4.09  | -2.89 |
| Kanpur      | 1.18  | -0.55 | -0.55 | 0.35  | -0.43 | -1.07 | 0.53  | -0.59 | -0.64 | 3.39  | -1.65 |
| Allahabad   | -0.12 | -2.07 | -1.16 | 0.60  | 1.45  | -0.18 | 0.97  | -1.08 | 0.57  | 4.54  | -3.55 |
| Varanasi    | -1.02 | -3.19 | -2.76 | 1.35  | -0.93 | -0.56 | 1.79  | 1.95  | -1.33 | 5.50  | -0.80 |
| Meerut      | 2.35  | -1.50 | -0.59 | 0.28  | -1.45 | -1.12 | 0.21  | -0.37 | -0.11 | 3.26  | -0.97 |
| Ghaziabad   | 2.58  | -1.51 | 0.32  | 0.10  | -1.86 | -2.12 | 1.45  | 0.40  | -0.50 | 2.81  | -1.68 |
| Agra        | 1.45  | -1.85 | -0.91 | 0.39  | 0.13  | -2.98 | 1.24  | 1.21  | -1.34 | 3.80  | -1.15 |
| Delhi       | 2.06  | -0.78 | -0.42 | 0.95  | -1.35 | -1.14 | -0.26 | -0.30 | -0.27 | 2.93  | -1.38 |
| Chandigarh  | 1.80  | -1.39 | -1.15 | 0.06  | -1.06 | -2.55 | 0.86  | 0.00  | 1.16  | 3.70  | -1.39 |
| Amritsar    | 2.33  | -0.96 | -2.34 | -0.38 | -0.96 | -1.60 | 1.00  | 0.08  | 0.72  | 3.92  | -1.81 |
| Srinagar    | 1.00  | 2.94  | -1.26 | -0.52 | -2.05 | -2.65 | -1.28 | -0.33 | 2.96  | 0.53  | 0.62  |
| Jodhpur     | 1.46  | 0.91  | -1.04 | 0.95  | 0.11  | -1.70 | -0.61 | -1.96 | -0.52 | 2.39  | 0.06  |
| Gwalior     | 2.48  | 0.27  | 0.29  | -1.63 | -0.99 | -3.56 | -1.20 | 0.01  | 2.42  | 4.22  | -2.35 |
| Ahmedabad   | 1.82  | -0.50 | -2.03 | -0.66 | -0.44 | -0.85 | -0.25 | 0.02  | 1.01  | 5.53  | -3.64 |
| Surat       | 0.85  | -1.34 | -1.21 | 1.54  | 0.29  | -0.14 | 1.39  | -0.39 | -0.25 | 1.45  | -2.15 |
| Vadodara    | 2.87  | -0.94 | -0.82 | -1.39 | -1.63 | -1.63 | -1.30 | -0.13 | -0.34 | 4.77  | 0.55  |
| Rajkot      | 1.26  | -1.71 | -0.86 | 0.17  | -1.55 | 0.23  | -1.49 | 0.11  | 1.38  | 2.85  | -0.42 |

|                    |       |       |       |       |       |       |       |       |       |       |       |
|--------------------|-------|-------|-------|-------|-------|-------|-------|-------|-------|-------|-------|
| Mumbai             | 0.47  | -0.20 | -0.49 | -0.52 | -0.31 | -0.16 | 0.70  | -0.23 | -0.44 | 1.58  | -0.36 |
| Pune               | 0.39  | -0.97 | 0.42  | 0.91  | -0.41 | -2.03 | 1.40  | 0.53  | -0.80 | 2.36  | -1.76 |
| Nasik              | 1.37  | 0.23  | 0.27  | 0.55  | 1.18  | -1.62 | 0.09  | -0.62 | -2.45 | 1.80  | -0.76 |
| Raipur             | 3.81  | -2.32 | 1.96  | -0.89 | -2.00 | -1.94 | 2.24  | 0.91  | 1.42  | 0.93  | -4.07 |
| Durg-Bhilainagar   | 3.26  | -0.69 | 1.88  | 1.11  | -0.96 | -3.17 | 1.48  | -1.43 | 0.32  | 3.14  | -4.90 |
| Hyderabad          | -0.88 | -0.44 | 0.48  | 1.28  | -1.52 | -2.16 | 1.13  | 1.70  | 0.36  | 1.55  | -1.55 |
| Vijayawada         | -1.31 | -2.31 | -0.53 | 0.07  | -0.26 | 0.01  | 1.00  | -0.49 | -0.66 | 4.47  | 0.02  |
| Bangalore          | -1.34 | -1.18 | 0.29  | 1.12  | 1.90  | -1.63 | 2.35  | 0.63  | -2.23 | 0.59  | -0.53 |
| Chennai            | -0.58 | -0.58 | -0.51 | -0.55 | 1.66  | -0.67 | -0.34 | 0.20  | -0.11 | 2.35  | -0.87 |
| Coimbatore         | -0.38 | -1.50 | -0.65 | 1.14  | 1.17  | -1.50 | 0.06  | 0.96  | -1.21 | 3.30  | -1.38 |
| Madurai            | 0.80  | -1.70 | -0.81 | 2.43  | 0.36  | -3.00 | -0.97 | 0.71  | -1.42 | 3.22  | 0.43  |
| Kannur             | -0.09 | -0.12 | -1.02 | 0.00  | 0.65  | 0.42  | 1.06  | 0.73  | -1.63 | -0.47 | 0.50  |
| Kozhikode          | 0.68  | -1.31 | -0.94 | 0.57  | 1.19  | -0.73 | 0.72  | 0.64  | -0.68 | -1.09 | 0.98  |
| Kollam             | -0.99 | -0.51 | -1.99 | 0.98  | 1.18  | 0.12  | 0.48  | -0.88 | -0.79 | 0.78  | 1.63  |
| Thiruvananthapuram | -0.21 | -0.62 | -0.71 | 0.05  | 0.46  | -0.14 | 0.24  | -0.70 | 0.49  | 0.97  | 0.20  |
| Thrissur           | -0.92 | -0.81 | -1.46 | 0.54  | 1.47  | -0.52 | -0.08 | 0.20  | 0.43  | -0.66 | 1.83  |
| Kochi              | 0.90  | 0.34  | -0.86 | 0.50  | 0.28  | 0.23  | 0.27  | -0.54 | -0.69 | 0.73  | -1.15 |
| Malappuram         | -0.25 | -0.49 | -0.42 | 1.11  | 0.49  | -1.20 | -0.69 | 0.80  | -0.71 | 0.79  | 0.52  |
| Purnia             | 1.55  | 0.26  | 0.93  | 0.81  | 1.67  | -0.65 | 0.70  | -1.94 | -0.97 | -0.43 | -1.93 |
| Gorakhpur          | 1.66  | -1.94 | -0.81 | 0.21  | 1.38  | -1.88 | 1.56  | -1.04 | -1.58 | 4.33  | -1.88 |
| Cuttak             | 1.45  | -0.49 | 0.91  | 0.58  | 0.57  | 0.28  | 2.90  | -0.21 | -1.75 | -0.87 | -3.37 |
| Lucknow            | 1.43  | -0.99 | 0.31  | -0.31 | -0.09 | -1.01 | 0.39  | 0.39  | -0.51 | 3.17  | -2.77 |
| Kanpur             | 0.64  | -1.90 | -0.08 | 0.79  | 0.70  | -2.16 | 0.74  | -0.15 | -0.98 | 4.22  | -1.82 |
| Bareilly           | 1.23  | -1.16 | 0.21  | 0.00  | 0.72  | -1.60 | -0.14 | -0.88 | -0.85 | 3.83  | -1.35 |
| Gwalior            | 1.93  | -0.83 | -0.57 | -0.08 | -0.92 | -3.13 | -0.02 | 0.23  | 0.55  | 4.99  | -2.15 |
| Jabalpur           | 1.54  | -0.08 | -0.02 | 0.26  | -1.06 | -2.95 | 0.02  | 0.28  | -0.22 | 3.92  | -1.70 |
| Bhopal             | 0.51  | -0.23 | -0.92 | 0.45  | -0.73 | -2.54 | 0.29  | 0.31  | 0.49  | 4.37  | -2.01 |
| Nagpur             | 0.42  | -1.09 | 0.71  | 0.63  | -1.71 | -2.79 | -0.26 | 0.59  | -0.56 | 6.70  | -2.64 |

|           |      |       |       |      |       |       |      |      |       |      |       |
|-----------|------|-------|-------|------|-------|-------|------|------|-------|------|-------|
| Kota      | 2.52 | 0.34  | -1.80 | 0.10 | -1.36 | -1.85 | 0.02 | 0.34 | -0.12 | 2.61 | -0.80 |
| Hyderabad | 0.72 | -0.42 | 0.26  | 0.30 | -1.02 | -1.04 | 0.72 | 0.28 | -1.31 | 1.83 | -0.30 |

**Table S5. LST anomaly of pre-monsoon average LST of 14 biosphere reserves**

| Name                  | 2010  | 2011  | 2012  | 2013  | 2014  | 2015  | 2016  | 2017  | 2018  | 2019  | 2020  |
|-----------------------|-------|-------|-------|-------|-------|-------|-------|-------|-------|-------|-------|
| Panna                 | 1.71  | 0.47  | 0.33  | 0.36  | -1.74 | -3.07 | 1.99  | 0.19  | -1.21 | 3.52  | -2.55 |
| Sundarban             | -0.31 | -0.21 | 0.00  | 0.45  | 1.05  | -0.13 | -0.12 | -0.44 | -0.37 | -0.02 | 0.10  |
| Seshachalam           | 0.00  | -0.50 | 0.04  | 1.86  | 0.13  | -0.95 | 0.38  | 0.08  | -3.14 | 1.74  | 0.36  |
| Nilgiri               | 0.64  | -2.91 | 1.18  | 0.07  | 1.17  | -1.51 | 0.94  | 0.05  | -1.55 | 1.63  | 0.27  |
| Agasthyamalai         | 1.09  | -0.81 | 0.26  | 0.63  | 0.02  | -1.66 | 0.07  | 2.39  | -1.69 | 1.21  | -1.50 |
| Khanchendzonga        | 0.53  | 0.32  | -0.38 | -0.57 | -0.43 | -0.58 | 0.38  | 0.41  | 0.03  | 1.60  | -1.32 |
| Nokrek                | 0.69  | -0.83 | 1.07  | 1.16  | 1.33  | -0.31 | 0.71  | -1.17 | -0.43 | -1.36 | -0.84 |
| Nanda Devi            | 3.61  | -1.21 | -1.21 | -0.05 | -2.12 | -1.63 | 1.55  | 0.97  | 0.63  | 1.62  | -2.17 |
| Pachmarhi             | 3.12  | 2.37  | 0.80  | -0.53 | -0.76 | -2.20 | -0.93 | -0.22 | -1.27 | 2.46  | -2.85 |
| Achanakmar-Amarkantak | 2.35  | 0.96  | 0.87  | -0.94 | -2.22 | -2.88 | 0.72  | 2.04  | 0.28  | 4.63  | -5.80 |
| Simlipal              | 1.32  | -0.78 | 1.00  | 0.36  | 2.04  | 0.84  | 1.90  | 1.32  | -2.66 | -1.49 | -3.82 |
| Manas                 | -0.98 | 0.30  | 0.50  | 0.98  | 1.11  | -0.13 | -0.44 | -0.62 | -0.58 | -1.23 | 1.09  |
| Dibru-Saikhowa        | -2.02 | 0.32  | 1.14  | 0.28  | 1.93  | 1.34  | -1.36 | -0.69 | -0.48 | -0.85 | 0.38  |
| Dihang-Dibang         | -0.07 | -1.20 | -1.11 | 0.43  | 0.99  | 0.66  | -0.88 | -0.02 | -0.18 | 1.74  | -0.36 |



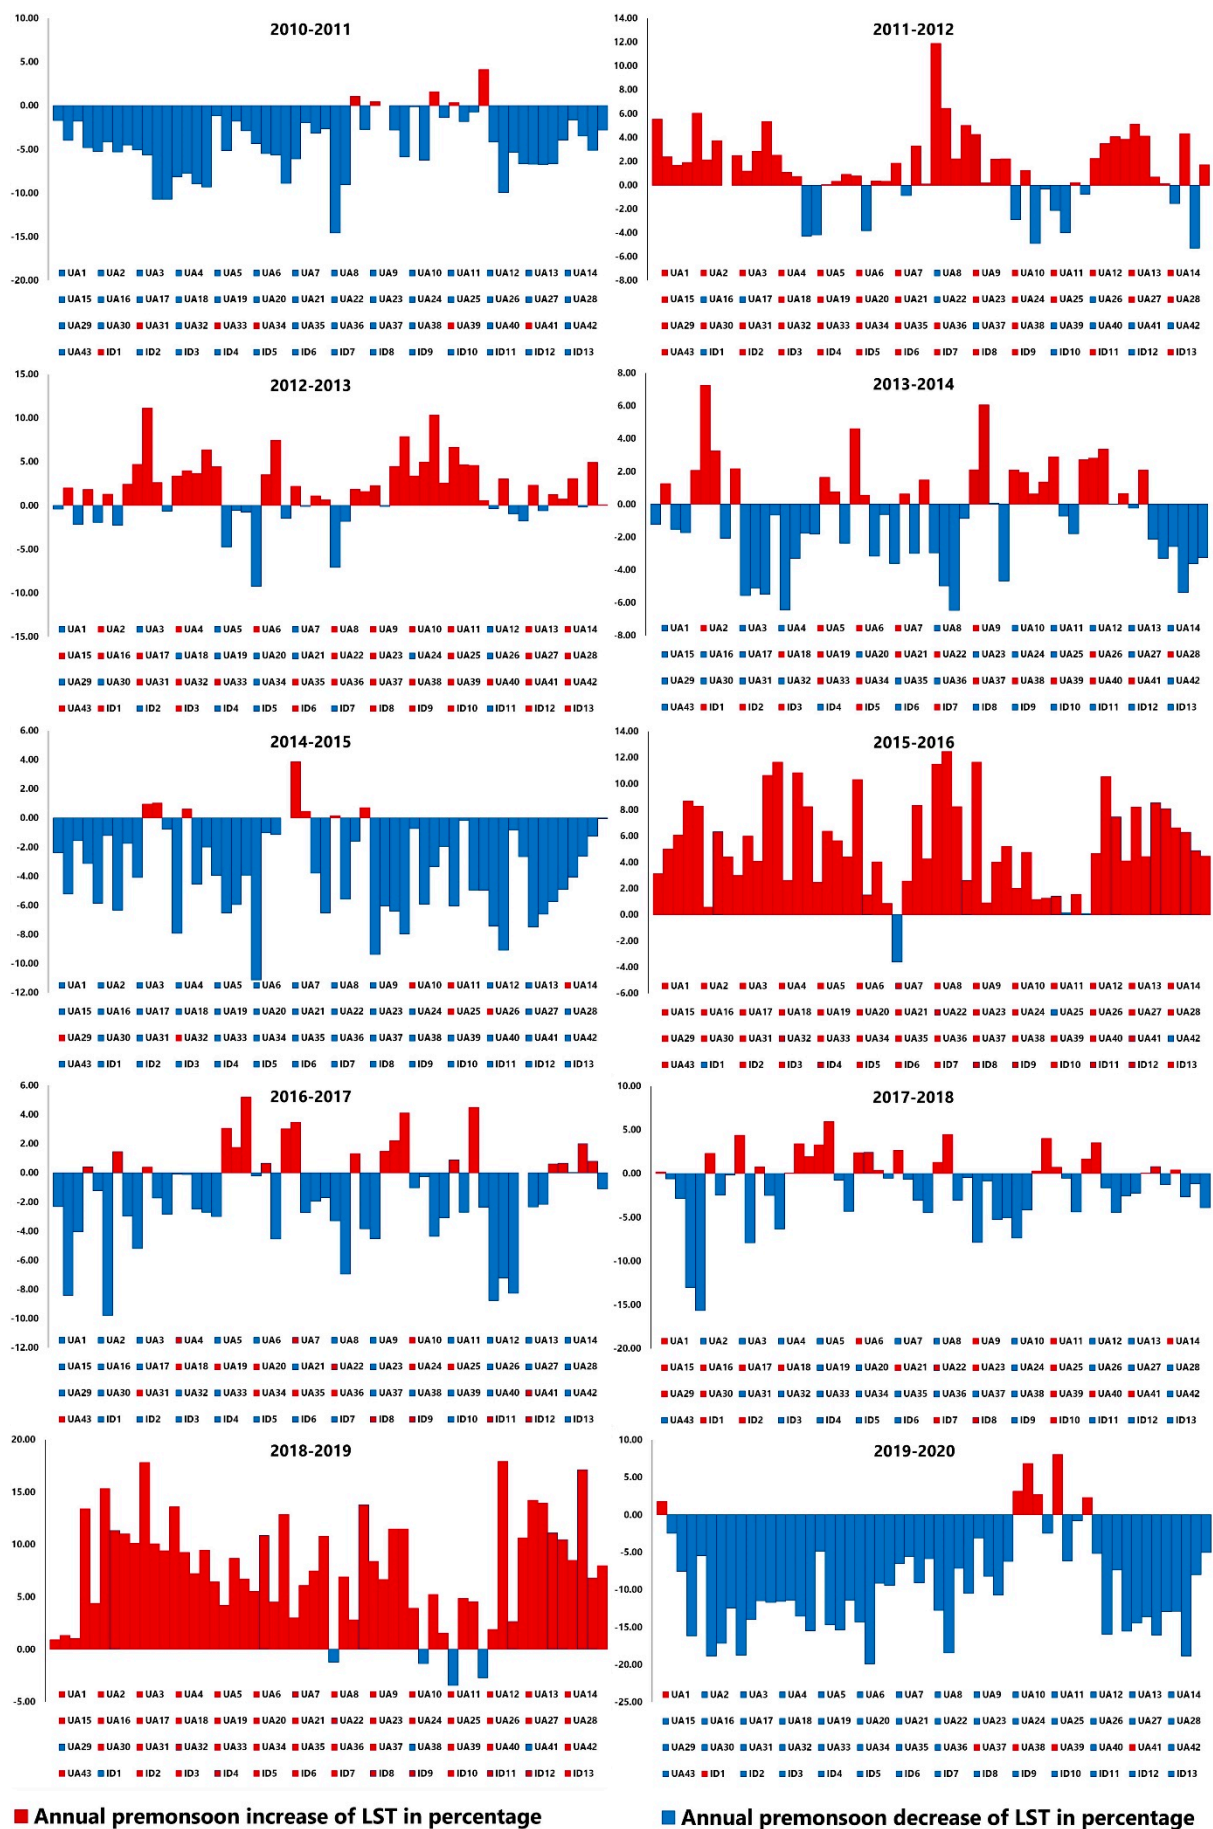

Figure S1. Annual pre-monsoon LST level percentage change
